# Supplementary material for: Symptoms and signs of lung cancer prior to diagnosis: Comparative study using electronic health records
Source: bioRxiv or medRxiv preprint supplement (doi:10.1101/2022.06.01.22275657), 2022-06-02
Supplement: Supplementary file [file media-1.pdf]

## Symptoms and signs of lung cancer prior to diagnosis: Comparative study using natural language processing of electronic health records

### Appendix 1. Diagnostic codes used to identify cases of lung cancer

ICD 9: 162.2 – 162.9

- 162.2 - Malignant neoplasm of main bronchus
- 162.3 - Malignant neoplasm of upper lobe, bronchus or lung
- 162.4 - Malignant neoplasm of middle lobe, bronchus or lung
- 162.5 - Malignant neoplasm of lower lobe, bronchus or lung
- 162.8 - Malignant neoplasm of other parts of bronchus or lung
- 162.9 - Malignant neoplasm of bronchus and lung, unspecified

ICD 10: C34.0 – C34.9

- C34.0 - Malignant neoplasm of main bronchus
- C34.00 - Malignant neoplasm of unspecified main bronchus
- C34.01 - Malignant neoplasm of right main bronchus
- C34.02 - Malignant neoplasm of left main bronchus
- C34.1 - Malignant neoplasm of upper lobe, bronchus or lung
- C34.10 - Malignant neoplasm of upper lobe, unspecified bronchus or lung
- C34.11 - Malignant neoplasm of upper lobe, right bronchus or lung
- C34.12 - Malignant neoplasm of upper lobe, left bronchus or lung
- C34.2 - Malignant neoplasm of middle lobe, bronchus or lung
- C34.3 - Malignant neoplasm of lower lobe, bronchus or lung
- C34.30 - Malignant neoplasm of lower lobe, unspecified bronchus or lung
- C34.31 - Malignant neoplasm of lower lobe, right bronchus or lung
- C34.32 - Malignant neoplasm of lower lobe, left bronchus or lung
- C34.8 - Malignant neoplasm of overlapping sites of bronchus and lung
- C34.80 - Malignant neoplasm of overlapping sites of unspecified bronchus and lung
- C34.81 - Malignant neoplasm of overlapping sites of right bronchus and lung
- C34.82 - Malignant neoplasm of overlapping sites of left bronchus and lung
- C34.9 - Malignant neoplasm of unspecified part of bronchus or lung
- C34.90 - Malignant neoplasm of unspecified part of unspecified bronchus or lung
- C34.91 - Malignant neoplasm of unspecified part of right bronchus or lung
- C34.92 - Malignant neoplasm of unspecified part of left bronchus or lung

Excluded ICD Diagnostic Codes

- ICD-9: 162.0
- ICD-10: C33

Excluded Histology codes

- Mesothelioma: 9050-9055
- Kaposi Sarcoma: 9140
- Lymphoma/leukemia: M9590-M9992

**Appendix 2. Symptoms and signs Identified in peer-reviewed literature previously associated with lung cancer in primary care populations**

| Symptom or sign          | ICD 9 code(s)                                 | ICD10 code(s)                      | References                                                                                                                                                                                                                                                                                                                                        |
|--------------------------|-----------------------------------------------|------------------------------------|---------------------------------------------------------------------------------------------------------------------------------------------------------------------------------------------------------------------------------------------------------------------------------------------------------------------------------------------------|
| Ankle swelling           | 782.3                                         | R60.9                              | <sup>1</sup> Ellis (2011)                                                                                                                                                                                                                                                                                                                         |
| Back pain                | 724.1                                         | M54.6                              | <sup>1</sup> Ellis (2011) <sup>2</sup> Molassiotis (2010)                                                                                                                                                                                                                                                                                         |
| Bone pain                | 733.9                                         | M85.80                             | <sup>3</sup> Gould (2008) <sup>4</sup> Nadpara (2015)                                                                                                                                                                                                                                                                                             |
| Changes in bowel habits  | 787.99                                        | R19.4                              | <sup>5</sup> Corner (2005)                                                                                                                                                                                                                                                                                                                        |
| Changes in sleep         | 780.50                                        | G47.9                              | <sup>5</sup> Corner (2005)                                                                                                                                                                                                                                                                                                                        |
| Chest Pain               | 786.5<br>786.50<br>786.51<br>786.52<br>786.59 | R07.9<br>R07.81                    | <sup>1</sup> Ellis (2011) <sup>4</sup> Nadpara (2015) <sup>5</sup> Corner (2005)<br><sup>6</sup> Chowienczyk, Hamilton (2020) <sup>7</sup> Walter (2015)<br><sup>8</sup> Hamilton (2005) <sup>9</sup> Ades (2014) <sup>10</sup> Redaniel (2015)<br><sup>11</sup> Tod (2008) <sup>12</sup> Mitchell (2013)                                         |
| Chest crackles or wheeze | 786.7                                         | R09.89                             | <sup>10</sup> Redaniel (2015)                                                                                                                                                                                                                                                                                                                     |
| Cough                    | 786.2<br>491.0                                | R05                                | <sup>1</sup> Ellis (2011) <sup>2</sup> Molassiotis (2010) <sup>4</sup> Nadpara (2015)<br><sup>5</sup> Corner (2005) <sup>6</sup> Chowienczyk, Hamilton (2020)<br><sup>7</sup> Walter (2015) <sup>9</sup> Ades (2014) <sup>10</sup> Redaniel (2015)<br><sup>11</sup> Tod (2008) <sup>12</sup> Mitchell (2013) <sup>13</sup> Menon (2019)           |
| Dizziness                | 780.4                                         | R42                                | <sup>2</sup> Molassiotis (2010)                                                                                                                                                                                                                                                                                                                   |
| Fatigue/tiredness        | 780.79                                        | R53.81<br>R53.8<br>R53.83<br>R53.1 | <sup>1</sup> Ellis (2011) <sup>2</sup> Molassiotis (2010) <sup>5</sup> Corner (2005)<br><sup>6</sup> Chowienczyk, Hamilton (2020) <sup>7</sup> Walter (2015)<br><sup>8</sup> Hamilton (2005) <sup>10</sup> Redaniel (2015) <sup>11</sup> Tod (2008)<br><sup>13</sup> Menon (2019)                                                                 |
| Fever                    | 780.6<br>780.60                               | R50.9                              | <sup>4</sup> Nadpara (2015)                                                                                                                                                                                                                                                                                                                       |
| Finger clubbing          | 781.5                                         | R68.3                              | <sup>4</sup> Nadpara (2015) <sup>8</sup> Hamilton (2005) <sup>10</sup> Redaniel (2015)                                                                                                                                                                                                                                                            |
| Headache                 | 784.0                                         | R51                                | <sup>1</sup> Ellis (2011)                                                                                                                                                                                                                                                                                                                         |
| Hemoptysis               | 786.3<br>786.30<br>786.39                     | R04.2                              | <sup>1</sup> Ellis (2011) <sup>4</sup> Nadpara (2015) <sup>5</sup> Corner<br><sup>6</sup> Chowienczyk, Hamilton (2020) <sup>7</sup> Walter (2015)<br><sup>8</sup> Hamilton (2005) <sup>10</sup> Redaniel (2015) (2005) <sup>11</sup> Tod<br>(2008) <sup>12</sup> Mitchell (2013) <sup>13</sup> Menon (2019)<br><sup>14</sup> Hippisley-Cox (2011) |

|                      |                          |                               |                                                                                                                                                                                                                                                                                                                    |
|----------------------|--------------------------|-------------------------------|--------------------------------------------------------------------------------------------------------------------------------------------------------------------------------------------------------------------------------------------------------------------------------------------------------------------|
| Hoarseness           | 784.49<br>784.42         | R49.8<br>R49.0                | <sup>1</sup> Ellis (2011) <sup>2</sup> Molassiotis (2010) <sup>7</sup> Walter (2015)<br><sup>10</sup> Redaniel (2015) <sup>11</sup> Tod (2008) <sup>12</sup> Mitchell (2013)                                                                                                                                       |
| Lack of appetite     | 783                      | R63.0                         | <sup>1</sup> Ellis (2011) <sup>2</sup> Molassiotis (2010) <sup>5</sup> Corner (2005)<br><sup>6</sup> Chowienczyk, Hamilton (2020) <sup>7</sup> Walter (2015)<br><sup>8</sup> Hamilton (2005) <sup>13</sup> Menon (2019)                                                                                            |
| Lymphadenopathy      | 785.6                    | R59.9                         | <sup>10</sup> Redaniel (2015) <sup>12</sup> Mitchell (2013)                                                                                                                                                                                                                                                        |
| Muscle weakness      | 728.87                   | M62.81                        | <sup>4</sup> Nadpara (2015) <sup>12</sup> Mitchell (2013)                                                                                                                                                                                                                                                          |
| Night sweats         | 780.8                    | R61                           | <sup>3</sup> Gould (2008) <sup>5</sup> Corner (2005)                                                                                                                                                                                                                                                               |
| Shortness of breath  | 786.05<br>786.0<br>786.9 | R06.02<br>R06.00<br>R06.09    | <sup>1</sup> Ellis (2011) <sup>2</sup> Molassiotis (2010) <sup>4</sup> Nadpara (2015)<br><sup>5</sup> Corner (2005) <sup>6</sup> Chowienczyk, Hamilton (2020)<br><sup>7</sup> Walter (2015) <sup>8</sup> Hamilton (2005) <sup>10</sup> Redaniel<br>(2015) <sup>12</sup> Mitchell (2013) <sup>13</sup> Menon (2019) |
| Shoulder pain        | 719.41                   | M25.511<br>M25.512<br>M25.519 | <sup>10</sup> Redaniel (2015) <sup>12</sup> Mitchell (2013)                                                                                                                                                                                                                                                        |
| Weight loss          | 783.21                   | R63.4                         | <sup>1</sup> Ellis (2011) <sup>4</sup> Nadpara (2015) <sup>5</sup> Corner (2005)<br><sup>6</sup> Chowienczyk, Hamilton (2020) <sup>7</sup> Walter (2015)<br><sup>8</sup> Hamilton (2005) <sup>10</sup> Redaniel (2015) <sup>11</sup> Tod (2008)<br><sup>12</sup> Mitchell (2013)                                   |
| Wheezing and stridor | 786.07<br>786.1          | R06.2<br>R06.1                | <sup>4</sup> Nadpara (2015) <sup>10</sup> Redaniel (2015)                                                                                                                                                                                                                                                          |

1. Ellis PM, Vandermeer R. Delays in the diagnosis of lung cancer. *J Thorac Dis.* 2011;3(3):183-188. doi:10.3978/j.issn.2072-1439.2011.01.01
2. Molassiotis A, Wilson B, Brunton L, Chandler C. Mapping patients' experiences from initial change in health to cancer diagnosis: a qualitative exploration of patient and system factors mediating this process. *Eur J Cancer Care (Engl).* 2010;19(1):98-109. doi:10.1111/j.1365-2354.2008.01020.x
3. Gould MK, Ghaus SJ, Olsson JK, Schultz EM. Timeliness of Care in Veterans With Non-small Cell Lung Cancer. *Chest.* 2008;133(5):1167-1173. doi:10.1378/chest.07-2654
4. Nadpara PA, Madhavan SS, Tworek C, Sambamoorthi U, Hendryx M, Almubarak M. Guideline-concordant lung cancer care and associated health outcomes among elderly patients in the United States. *J Geriatr Oncol.* 2015;6(2):101-110. doi:10.1016/j.jgo.2015.01.001
5. Corner J, Hopkinson J, Fitzsimmons D, Barclay S, Muers M. Is late diagnosis of lung cancer inevitable? Interview study of patients' recollections of symptoms before diagnosis. *Thorax.* 2005;60(4):314-319. doi:10.1136/thx.2004.029264

6. Chowienczyk S, Price S, Hamilton W. Changes in the presenting symptoms of lung cancer from 2000–2017: a serial cross-sectional study of observational records in UK primary care. *Br J Gen Pract.* 2020;70(692):e193-e199. doi:10.3399/bjgp20X708137
7. Walter FM, Rubin G, Bankhead C, et al. Symptoms and other factors associated with time to diagnosis and stage of lung cancer: a prospective cohort study. *Br J Cancer.* 2015;112(S1):S6-S13. doi:10.1038/bjc.2015.30
8. Hamilton W. What are the clinical features of lung cancer before the diagnosis is made? A population based case-control study. *Thorax.* 2005;60(12):1059-1065. doi:10.1136/thx.2005.045880
9. Ades AE, Biswas M, Welton NJ, Hamilton W. Symptom lead time distribution in lung cancer: natural history and prospects for early diagnosis. *Int J Epidemiol.* 2014;43(6):1865-1873. doi:10.1093/ije/dyu174
10. Redaniel MT, Martin RM, Ridd MJ, Wade J, Jeffreys M. Diagnostic Intervals and Its Association with Breast, Prostate, Lung and Colorectal Cancer Survival in England: Historical Cohort Study Using the Clinical Practice Research Datalink. Metze K, ed. *PLOS ONE.* 2015;10(5):e0126608. doi:10.1371/journal.pone.0126608
11. Tod AM, Craven J, Allmark P. Diagnostic delay in lung cancer: a qualitative study: Diagnostic delay in lung cancer. *J Adv Nurs.* 2008;61(3):336-343. doi:10.1111/j.1365-2648.2007.04542.x
12. Mitchell ED, Rubin G, Macleod U. Understanding diagnosis of lung cancer in primary care: qualitative synthesis of significant event audit reports. *Br J Gen Pract.* 2013;63(606):e37-e46. doi:10.3399/bjgp13X660760
13. Menon U, Vedsted P, Zalounina Falborg A, et al. Time intervals and routes to diagnosis for lung cancer in 10 jurisdictions: cross-sectional study findings from the International Cancer Benchmarking Partnership (ICBP). *BMJ Open.* 2019;9(11):e025895. doi:10.1136/bmjopen-2018-025895

**Appendix 3. Comparison of the number of patients with symptoms and signs extracted from the electronic medical record of cases or controls from coded fields versus free-text data using natural language processing (NLP)**

| <b>Symptom or sign</b>   | <b>Identified from NLP<br/>(% of patients)</b> | <b>Identified from coded data<br/>(% of patients)</b> | <b>Identified from either coded data or NLP<br/>(% of patients)</b> | <b>NLP adds (NLP adds n/coded or NLP n)</b> |
|--------------------------|------------------------------------------------|-------------------------------------------------------|---------------------------------------------------------------------|---------------------------------------------|
| Cough                    | 1700 (22.6%)                                   | 1139 (15.1%)                                          | 2227 (29.5%)                                                        | 1088 (48.9%)                                |
| Shortness of breath      | 1580 (21.0%)                                   | 1111 (14.7%)                                          | 2128 (28.2%)                                                        | 1017 (47.8%)                                |
| Chest Pain               | 1241 (16.5%)                                   | 981 (13.0%)                                           | 1804 (23.9%)                                                        | 823 (45.6%)                                 |
| Fatigue                  | 1489 (19.8%)                                   | 959 (12.7%)                                           | 2063 (27.4%)                                                        | 1104 (53.5%)                                |
| Shoulder pain            | 513 (6.8%)                                     | 594 (7.9%)                                            | 893 (11.9%)                                                         | 299 (33.5%)                                 |
| Dizziness                | 1331 (17.7%)                                   | 536 (7.1%)                                            | 1618 (21.5%)                                                        | 1082 (66.9%)                                |
| Ankle swelling           | 2081 (27.6%)                                   | 509 (6.8%)                                            | 2285 (30.3%)                                                        | 1776 (77.7%)                                |
| Headache                 | 1281 (17.0%)                                   | 415 (5.5%)                                            | 1509 (20.0%)                                                        | 1094 (72.5%)                                |
| Weight loss              | 646 (8.6%)                                     | 328 (4.4%)                                            | 830 (11.0%)                                                         | 502 (60.5%)                                 |
| Fever                    | 1517 (20.1%)                                   | 252 (3.3%)                                            | 1656 (22.0%)                                                        | 1404 (84.8%)                                |
| Chest crackles or wheeze | 834 (11.1%)                                    | 242 (3.2%)                                            | 972 (12.9%)                                                         | 730 (75.1%)                                 |
| Lymphadenopathy          | 52 (0.7%)                                      | 223 (3.0%)                                            | 256 (3.4%)                                                          | 33 (12.9%)                                  |
| Bone pain                | 829 (11.0%)                                    | 216 (2.9%)                                            | 995 (13.2%)                                                         | 779 (78.3%)                                 |
| Muscle weakness          | 1327 (17.6%)                                   | 205 (2.7%)                                            | 1436 (19.1%)                                                        | 1231 (85.7%)                                |
| Back pain                | 1220 (16.2%)                                   | 154 (2.0%)                                            | 1296 (17.2%)                                                        | 1142 (88.1%)                                |
| Changes in sleep         | 662 (8.8%)                                     | 137 (1.8%)                                            | 765 (10.2%)                                                         | 628 (82.1%)                                 |
| Hoarseness               | 130 (1.7%)                                     | 118 (1.6%)                                            | 200 (2.7%)                                                          | 82 (41.0%)                                  |
| Hemoptysis               | 133 (1.8%)                                     | 94 (1.3%)                                             | 182 (2.4%)                                                          | 88 (48.4%)                                  |
| Night sweats             | 480 (6.4%)                                     | 72 (1.0%)                                             | 521 (6.9%)                                                          | 449 (86.2%)                                 |
| Lack of appetite         | 626 (8.3%)                                     | 59 (0.8%)                                             | 653 (8.7%)                                                          | 594 (91.0%)                                 |
| Change in bowel habits   | 1465 (19.4%)                                   | 59 (0.8%)                                             | 1491 (19.8%)                                                        | 1432 (96.0%)                                |
| Finger clubbing          | 41 (0.5%)                                      | 1 (0.0%)                                              | 41 (0.5%)                                                           | 40 (97.6%)                                  |

**Appendix 4. Multivariable analysis of symptoms or signs of cases compared to controls at 1, 3, 6 and 12 months prior to diagnosis/index date**

| Symptom or sign                 | 12 months<br>OR       | 6 months<br>OR        | 3 months<br>OR        | 1 month<br>OR          | At diagnosis<br>OR    |
|---------------------------------|-----------------------|-----------------------|-----------------------|------------------------|-----------------------|
| <b>Finger clubbing</b>          | >1,000 (0.0 - >1,000) | >1,000 (0.0 - >1,000) | >1,000 (0.0 - >1,000) | 60.7 (10.6 - 348.7)*** | 50.1 (8.9 - 283.3)*** |
| <b>Lymphadenopathy</b>          | 0.7 (0.3 - 1.4)       | 1.3 (0.7 - 2.4)       | 1.3 (0.8 - 2.3)       | 1.7 (1.0 - 2.8)*       | 5.8 (3.8 - 8.8)***    |
| <b>Cough</b>                    | 1.9 (1.5 - 2.4)***    | 3.1 (2.4 - 4.0)***    | 4.0 (3.1 - 5.2)***    | 5.0 (3.8 - 6.5)***     | 4.7 (3.5 - 6.3)***    |
| <b>Hemoptysis</b>               | 2.1 (1.0 - 4.4)*      | 3.2 (1.9 - 5.3)***    | 3.1 (1.9 - 4.9)***    | 3.4 (2.2 - 5.4)***     | 3.5 (2.2 - 5.5)***    |
| <b>Chest crackles or wheeze</b> | 2.5 (1.9 - 3.5)***    | 3.1 (2.3 - 4.1)***    | 3.0 (2.3 - 4.0)***    | 3.0 (2.3 - 4.0)***     | 3.2 (2.4 - 4.3)***    |
| <b>Weight loss</b>              | 1.2 (0.9 - 1.8)       | 2.1 (1.5 - 2.8)***    | 2.6 (1.9 - 3.4)***    | 2.8 (2.1 - 3.7)***     | 2.9 (2.2 - 3.9)***    |
| <b>Back pain</b>                | 2.8 (2.1 - 3.6)***    | 2.5 (1.9 - 3.2)***    | 2.5 (1.9 - 3.2)***    | 2.4 (1.9 - 3.1)***     | 2.4 (1.8 - 3.1)***    |
| <b>Bone pain</b>                | 2.8 (2.1 - 3.7)***    | 2.7 (2.1 - 3.6)***    | 2.4 (1.8 - 3.2)***    | 2.3 (1.7 - 3.0)***     | 2.3 (1.7 - 3.0)***    |
| <b>Shortness of breath</b>      | 0.7 (0.5 - 1.0)*      | 1.0 (0.7 - 1.3)       | 1.3 (1.0 - 1.7)       | 1.6 (1.2 - 2.1)**      | 1.9 (1.4 - 2.5)***    |
| <b>Fatigue</b>                  | 1.6 (1.2 - 2.1)***    | 1.6 (1.3 - 2.1)***    | 1.9 (1.4 - 2.5)***    | 1.8 (1.4 - 2.4)***     | 1.8 (1.3 - 2.3)***    |
| <b>Chest Pain</b>               | 1.1 (0.8 - 1.4)       | 1.2 (0.9 - 1.5)       | 1.2 (1.0 - 1.6)       | 1.3 (1.0 - 1.6)        | 1.4 (1.1 - 1.8)*      |
| <b>Shoulder pain</b>            | 1.3 (0.9 - 1.7)       | 1.4 (1.0 - 1.8)*      | 1.3 (1.0 - 1.7)       | 1.3 (1.0 - 1.7)        | 1.3 (0.9 - 1.7)       |
| <b>Ankle swelling</b>           | 1.5 (1.1 - 1.9)**     | 1.3 (1.0 - 1.7)       | 1.3 (1.0 - 1.7)       | 1.3 (1.0 - 1.7)        | 1.1 (0.9 - 1.5)       |
| <b>Headache</b>                 | 1.0 (0.7 - 1.3)       | 1.1 (0.8 - 1.4)       | 1.0 (0.8 - 1.3)       | 1.0 (0.8 - 1.3)        | 1.1 (0.8 - 1.4)       |
| <b>Hoarseness</b>               | 0.9 (0.5 - 1.7)       | 1.1 (0.7 - 1.8)       | 1.0 (0.6 - 1.6)       | 1.1 (0.7 - 1.7)        | 1.0 (0.7 - 1.7)       |
| <b>Changes in bowel habits</b>  | 1.2 (0.9 - 1.6)       | 1.0 (0.8 - 1.4)       | 1.1 (0.8 - 1.5)       | 1.0 (0.8 - 1.4)        | 1.0 (0.8 - 1.4)       |
| <b>Muscle weakness</b>          | 1.0 (0.7 - 1.3)       | 0.9 (0.7 - 1.2)       | 1.0 (0.7 - 1.3)       | 1.0 (0.8 - 1.3)        | 1.0 (0.7 - 1.3)       |
| <b>Night sweats</b>             | 0.9 (0.6 - 1.4)       | 0.9 (0.7 - 1.4)       | 0.9 (0.7 - 1.3)       | 0.9 (0.6 - 1.3)        | 0.8 (0.6 - 1.2)       |
| <b>Lack of appetite</b>         | 0.5 (0.3 - 0.7)***    | 0.6 (0.4 - 0.8)**     | 0.6 (0.4 - 0.8)**     | 0.6 (0.4 - 0.9)**      | 0.7 (0.5 - 0.9)*      |
| <b>Dizziness</b>                | 0.8 (0.6 - 1.0)       | 0.7 (0.5 - 0.9)**     | 0.7 (0.5 - 0.9)**     | 0.6 (0.5 - 0.8)**      | 0.6 (0.4 - 0.8)***    |
| <b>Changes in sleep</b>         | 0.8 (0.5 - 1.1)       | 0.5 (0.4 - 0.7)***    | 0.4 (0.3 - 0.6)***    | 0.4 (0.3 - 0.6)***     | 0.4 (0.3 - 0.6)***    |
| <b>Fever</b>                    | 0.6 (0.4 - 0.8)***    | 0.5 (0.4 - 0.7)***    | 0.5 (0.4 - 0.6)***    | 0.5 (0.3 - 0.6)***     | 0.4 (0.3 - 0.6)***    |

Note: Models adjusted for comorbidities using van Walraven weighted score. Confidence intervals for significant ORs do not incorporate 1.0 due to rounding.

\* p<0.05

\*\* p<0.01

\*\*\* p<0.001

**Appendix 5. Frequency of symptoms and signs in cases and controls with and without chronic respiratory disease**

| Symptom or sign          | Chronic respiratory disease |              | No chronic respiratory disease |              |
|--------------------------|-----------------------------|--------------|--------------------------------|--------------|
|                          | Control (n=1252)            | Case (n=353) | Control (n=5589)               | Case (n=345) |
| Cough                    | 636 (50.8%)                 | 312 (88.4%)  | 1018 (18.2%)                   | 261 (75.7%)  |
| Shortness of breath      | 623 (49.8%)                 | 307 (87.0%)  | 990 (17.7%)                    | 208 (60.3%)  |
| Fatigue                  | 459 (36.7%)                 | 266 (75.4%)  | 1128 (20.2%)                   | 210 (60.9%)  |
| Ankle swelling           | 516 (41.2%)                 | 250 (70.8%)  | 1322 (23.7%)                   | 197 (57.1%)  |
| Chest Pain               | 439 (35.1%)                 | 228 (64.6%)  | 962 (17.2%)                    | 175 (50.7%)  |
| Chest crackles or wheeze | 307 (24.5%)                 | 268 (75.9%)  | 268 (4.8%)                     | 129 (37.4%)  |
| Back pain                | 278 (22.2%)                 | 191 (54.1%)  | 668 (12.0%)                    | 159 (46.1%)  |
| Changes in bowel habits  | 337 (26.9%)                 | 195 (55.2%)  | 818 (14.6%)                    | 141 (40.9%)  |
| Muscle weakness          | 327 (26.1%)                 | 177 (50.1%)  | 775 (13.9%)                    | 157 (45.5%)  |
| Fever                    | 433 (34.6%)                 | 177 (50.1%)  | 901 (16.1%)                    | 145 (42.0%)  |
| Weight loss              | 165 (13.2%)                 | 191 (54.1%)  | 357 (6.4%)                     | 117 (33.9%)  |
| Headache                 | 324 (25.9%)                 | 175 (49.6%)  | 881 (15.8%)                    | 129 (37.4%)  |
| Dizziness                | 366 (29.2%)                 | 174 (49.3%)  | 953 (17.1%)                    | 125 (36.2%)  |
| Bone pain                | 207 (16.5%)                 | 141 (39.9%)  | 518 (9.3%)                     | 129 (37.4%)  |
| Lack of appetite         | 142 (11.3%)                 | 116 (32.9%)  | 315 (5.6%)                     | 80 (23.2%)   |
| Shoulder pain            | 200 (16.0%)                 | 92 (26.1%)   | 513 (9.2%)                     | 88 (25.5%)   |
| Lymphadenopathy          | 35 (2.8%)                   | 79 (22.4%)   | 70 (1.3%)                      | 72 (20.9%)   |
| Night sweats             | 113 (9.0%)                  | 89 (25.2%)   | 258 (4.6%)                     | 61 (17.7%)   |
| Changes in sleep         | 178 (14.2%)                 | 90 (25.5%)   | 453 (8.1%)                     | 44 (12.8%)   |
| Hemoptysis               | 31 (2.5%)                   | 72 (20.4%)   | 36 (0.6%)                      | 43 (12.5%)   |
| Hoarseness               | 55 (4.4%)                   | 45 (12.7%)   | 78 (1.4%)                      | 22 (6.4%)    |
| Finger clubbing          | 1 (0.1%)                    | 28 (7.9%)    | 1 (0.0%)                       | 11 (3.2%)    |

## Appendix 6. Multivariate analysis of symptoms and signs in patients with and without chronic respiratory disease

| Symptom or sign          | Chronic respiratory disease   |                                 |                      | No chronic respiratory disease |                                 |                      |
|--------------------------|-------------------------------|---------------------------------|----------------------|--------------------------------|---------------------------------|----------------------|
|                          | Univariate Odds ratio (95%CI) | Multivariate Odds ratio (95%CI) | Multivariate P value | Univariate Odds ratio (95%CI)  | Multivariate Odds ratio (95%CI) | Multivariate P value |
| Finger clubbing          | 47.3 (6.1 - 364.5)            | 17.8 (1.3 - 247.1)              | 0.0322               | >1,000 (0.0 - >1,000)          | 267.7 (0.1 - >1,000)            | 0.1783               |
| Chest crackles or wheeze | 9.4 (6.3 - 14.2)*             | 4.9 (2.6 - 9.0)                 | <0.0001              | 9.8 (7.0 - 13.9)*              | 3.2 (2.0 - 5.2)                 | <0.0001              |
| Hemoptysis               | 12.5 (6.2 - 25.3)*            | 4.4 (1.7 - 11.5)                | 0.0028               | 20.3 (10.2 - 40.5)*            | 3.8 (1.5 - 9.8)                 | 0.0049               |
| Weight loss              | 7.1 (4.7 - 10.5)*             | 4.0 (2.2 - 7.4)                 | <0.0001              | 3.8 (2.8 - 5.3)*               | 1.6 (1.0 - 2.5)                 | 0.0643               |
| Lymphadenopathy          | 7.1 (3.9 - 13.0)*             | 3.3 (1.3 - 7.9)                 | 0.0089               | 12.0 (7.2 - 19.9)*             | 8.5 (4.3 - 17.0)                | <0.0001              |
| Fatigue                  | 5.2 (3.6 - 7.6)*              | 2.9 (1.6 - 5.5)                 | 0.0008               | 4.2 (3.2 - 5.6)*               | 1.7 (1.1 - 2.6)                 | 0.0128               |
| Back pain                | 4.6 (3.2 - 6.6)*              | 2.4 (1.4 - 4.1)                 | 0.0014               | 4.8 (3.6 - 6.4)*               | 2.1 (1.4 - 3.2)                 | 0.0003               |
| Cough                    | 6.5 (4.2 - 10.2)*             | 2.2 (1.1 - 4.3)                 | 0.0189               | 12.2 (9.0 - 16.6)*             | 6.3 (4.2 - 9.3)                 | <0.0001              |
| Bone pain                | 3.8 (2.6 - 5.5)*              | 2.1 (1.1 - 4.0)                 | 0.0168               | 5.3 (3.9 - 7.2)*               | 2.5 (1.6 - 3.9)                 | 0.0001               |
| Shortness of breath      | 6.5 (4.1 - 10.3)*             | 1.6 (0.8 - 3.2)                 | 0.1688               | 5.1 (3.9 - 6.7)*               | 1.9 (1.3 - 2.9)                 | 0.0024               |
| Changes in bowel habits  | 2.7 (2.0 - 3.8)*              | 1.3 (0.7 - 2.3)                 | 0.4474               | 2.5 (1.9 - 3.4)*               | 0.9 (0.6 - 1.4)                 | 0.7286               |
| Night sweats             | 3.1 (2.1 - 4.7)*              | 1.2 (0.6 - 2.4)                 | 0.5393               | 3.8 (2.6 - 5.7)*               | 0.9 (0.5 - 1.7)                 | 0.8542               |
| Ankle swelling           | 2.8 (2.0 - 3.9)*              | 1.1 (0.6 - 2.0)                 | 0.6696               | 3.1 (2.4 - 4.0)*               | 1.2 (0.8 - 1.8)                 | 0.3121               |
| Shoulder pain            | 1.6 (1.1 - 2.4)               | 1.1 (0.6 - 2.0)                 | 0.7589               | 2.9 (2.1 - 4.0)*               | 1.6 (1.0 - 2.5)                 | 0.0484               |
| Hoarseness               | 2.5 (1.4 - 4.4)               | 1.0 (0.5 - 2.3)                 | 0.9617               | 4.1 (2.2 - 7.7)*               | 0.9 (0.4 - 2.2)                 | 0.8729               |
| Headache                 | 2.5 (1.9 - 3.5)*              | 0.9 (0.5 - 1.7)                 | 0.8551               | 2.2 (1.7 - 2.9)*               | 1.0 (0.7 - 1.6)                 | 0.8319               |
| Chest Pain               | 2.6 (1.9 - 3.6)*              | 0.9 (0.5 - 1.6)                 | 0.7953               | 3.7 (2.8 - 4.8)*               | 1.5 (1.0 - 2.2)                 | 0.0494               |
| Muscle weakness          | 2.3 (1.7 - 3.2)*              | 0.9 (0.5 - 1.7)                 | 0.7901               | 3.1 (2.3 - 4.1)*               | 1.1 (0.7 - 1.7)                 | 0.6809               |
| Dizziness                | 2.3 (1.7 - 3.3)*              | 0.9 (0.5 - 1.6)                 | 0.7450               | 1.8 (1.3 - 2.4)*               | 0.5 (0.3 - 0.8)                 | 0.0027               |
| Lack of appetite         | 2.6 (1.8 - 3.8)*              | 0.5 (0.3 - 1.0)                 | 0.0667               | 1.8 (1.3 - 2.6)                | 0.5 (0.3 - 0.9)                 | 0.0122               |
| Changes in sleep         | 1.6 (1.1 - 2.3)               | 0.5 (0.3 - 0.9)                 | 0.0233               | 1.1 (0.7 - 1.6)                | 0.3 (0.2 - 0.6)                 | 0.0004               |
| Fever                    | 1.6 (1.2 - 2.2)               | 0.3 (0.2 - 0.6)                 | 0.0003               | 2.5 (1.9 - 3.3)*               | 0.6 (0.4 - 0.9)                 | 0.0229               |

Note: Models adjusted for comorbidities using van Walraven weighted score

\*Significant at p<0.0001
